# Supplementary material
Source: MDPI journal article supplement (https://www.mdpi.com/2079-6412/14/3/247)
Supplement: s1 [file s1]

# Modified Graphene Micropillar Array Superhydrophobic Coating with Strong Anti-Icing Properties and Corrosion Resistance

Wanyu Zhang <sup>1,2</sup>, Fuchun Liu <sup>1,2,3,\*</sup>, Yushan Li <sup>1,2</sup>, Tao Chen <sup>1,2</sup>, Izuchukwu Kenneth Nwokolo <sup>1,2</sup>, Sharjeel Ahmed <sup>1,2</sup> and En-Hou Han <sup>3</sup>

<sup>1</sup> Key Laboratory of Nuclear Materials and Safety Assessment, Institute of Metal Research, Chinese Academy of Sciences, Shenyang 110016, China

<sup>2</sup> School of Materials Science and Engineering, University of Science and Technology of China, Shenyang 110016, China

<sup>3</sup> Institute of Corrosion Science and Technology, Guangzhou 510530, China

\* Correspondence: fcliu@imr.ac.cn

**Table S1.** The parameters of the commercial PET nets.

| Mesh number | Mesh size (μm) | Wire diameter (μm) |
|-------------|----------------|--------------------|
| 80          | 267±2          | 50±2               |
| 100         | 200±2          | 50±2               |
| 120         | 165±2          | 50±2               |
| 160         | 108±2          | 50±2               |
| 200         | 77±2           | 50±2               |

**Table S2.** The component A of varnish coating.

| Material        | Specification                                       | Composition (%) |
|-----------------|-----------------------------------------------------|-----------------|
| Resin           | F301                                                | 65              |
| Mixed solution  | M <sub>xylene</sub> : M <sub>butyl ester</sub> =8:2 | 34              |
| Defoamer        | BYK065                                              | 0.4             |
| Levelling agent | BYK306                                              | 0.6             |

**Table S3.** The element content of GP and AC-FAS-GP.

|           | Si2p (at%) | C1s (at%) | O1s (at%) | F1s (at%) |
|-----------|------------|-----------|-----------|-----------|
| GP        | —          | 91.81     | 8.19      | —         |
| AC-FAS-GP | 1.13       | 72.59     | 3.61      | 22.67     |

Tables S4–S8 exhibit the electrochemical parameters of Q80G–Q200G coatings. Among them, the relationship between Q and C is described by the following formula:

$$C = Q^{1/n} (1/R_s + 1/R)^{n-1/n}$$

where n represents the surface roughness index.

**Table S4.** The electrochemical parameters of the Q80G coating obtained through the equivalent circuit fitting.

| Time | $R_s$<br>(days) | $Q_{GC}$<br>( $\Omega \cdot \text{cm}^2$ ) | $n_{GC}$  | $R_{GC}$<br>( $\Omega \cdot \text{cm}^2$ ) | $Q_{FC}$<br>( $\text{S} \cdot \text{s}^\alpha / \text{cm}^2$ ) | $n_{FC}$  | $R_{FC}$<br>( $\Omega \cdot \text{cm}^2$ ) | $Q_{dl}$<br>( $\text{S} \cdot \text{s}^\alpha / \text{cm}^2$ ) | $n_{dl}$  | $R_{ct}$<br>( $\Omega \cdot \text{cm}^2$ ) | $W$        | $C_{GC}$<br>( $\text{F} \cdot \text{cm}^2$ ) | $C_{FC}$<br>( $\text{F} \cdot \text{cm}^2$ ) | $C_{dl}$<br>( $\text{F} \cdot \text{cm}^2$ ) |
|------|-----------------|--------------------------------------------|-----------|--------------------------------------------|----------------------------------------------------------------|-----------|--------------------------------------------|----------------------------------------------------------------|-----------|--------------------------------------------|------------|----------------------------------------------|----------------------------------------------|----------------------------------------------|
| 0.25 | 0.057<br>01     | 7.82                                       | 0.92<br>1 | 6.61E<br>3                                 | 3.00E-<br>6                                                    | 0.95<br>0 | 6.60E<br>4                                 | 7.18E-<br>6                                                    | 0.69<br>3 | 2.09E<br>4                                 | ---        | 1.0E-11.3E-<br>0                             | 1.0E-<br>6                                   | 1.0E-<br>8                                   |
| 1    | 214.6           | 5.02                                       | 0.96<br>3 | 6.10E<br>3                                 | 2.08E-<br>5                                                    | 0.95<br>9 | 1.01E<br>4                                 | 6.96E-<br>5                                                    | 0.39<br>0 | 7.70E<br>3                                 | ---        | 2.7E-11.7E-<br>0                             | 9.3E-<br>5                                   | 9.3E-<br>8                                   |
| 2    | 237.5           | 8.82                                       | 0.92<br>6 | 4.72E<br>3                                 | 9.10E-<br>5                                                    | 0.94<br>4 | 7.39E<br>3                                 | 3.20E-<br>5                                                    | 0.56<br>4 | 4.35E<br>3                                 | ---        | 2.6E-17.2E-<br>0                             | 7.0E-<br>5                                   | 7.0E-<br>7                                   |
| 3    | 0.080<br>86     | 56.3                                       | 0.79<br>2 | 3.79E<br>3                                 | 5.96E-<br>5                                                    | 0.94<br>2 | 7.46E<br>3                                 | 1.33E-<br>5                                                    | 0.77<br>6 | 2.89E<br>3                                 | 5.4E-<br>4 | 2.0E-12.8E-<br>1                             | 2.5E-<br>5                                   | 2.5E-<br>7                                   |
| 5    | 0.007<br>53     | 115                                        | 0.74<br>1 | 2.77E<br>3                                 | 9.71E-<br>5                                                    | 0.87<br>3 | 5.38E<br>3                                 | 7.70E-<br>6                                                    | 0.82<br>5 | 2.63E<br>3                                 | 1.1E-<br>3 | 3.5E-11.2E-<br>2                             | 2.2E-<br>5                                   | 2.2E-<br>7                                   |
| 7    | 0.023<br>36     | 191                                        | 0.71<br>2 | 2.83E<br>3                                 | 3.96E-<br>4                                                    | 0.81<br>3 | 2.15E<br>3                                 | 9.97E-<br>6                                                    | 0.80<br>6 | 2.39E<br>3                                 | 2.1E-<br>2 | 3.1E-12.8E-<br>2                             | 2.5E-<br>5                                   | 2.5E-<br>7                                   |
| 9    | 0.002<br>30     | 424                                        | 0.65<br>7 | 2.83E<br>3                                 | 1.88E-<br>4                                                    | 0.94<br>7 | 2.61E<br>3                                 | 1.23E-<br>5                                                    | 0.77<br>1 | 2.57E<br>3                                 | 1.6E-<br>3 | 2.5E-18.3E-<br>3                             | 7.1E-<br>5                                   | 7.1E-<br>8                                   |
| 12   | 0.016<br>45     | 184                                        | 0.71<br>3 | 2.93E<br>3                                 | 2.26E-<br>4                                                    | 0.95<br>5 | 2.31E<br>3                                 | 1.91E-<br>5                                                    | 0.68<br>2 | 2.64E<br>3                                 | 1.8E-<br>3 | 2.7E-11.3E-<br>2                             | 1.8E-<br>4                                   | 1.8E-<br>8                                   |
| 16   | 0.026<br>26     | 441                                        | 0.66<br>1 | 3.72E<br>3                                 | 2.02E-<br>4                                                    | 0.81<br>1 | 3.72E<br>3                                 | 4.01E-<br>5                                                    | 0.61<br>7 | 2.12E<br>3                                 | 1.8E-<br>3 | 1.2E-11.2E-<br>2                             | 7.6E-<br>5                                   | 7.6E-<br>9                                   |

**Table S5.** The electrochemical parameters of the Q100G coating obtained through the equivalent circuit fitting.

| Time<br>(days) | $R_s$<br>( $\Omega \cdot \text{cm}^2$ ) | $Q_{GC}$<br>( $\text{S} \cdot \text{s}^\alpha / \text{cm}^2$ ) | $n_{GC}$ | $R_{GC}$<br>( $\Omega \cdot \text{cm}^2$ ) | $Q_{FC}$<br>( $\text{S} \cdot \text{s}^\alpha / \text{cm}^2$ ) | $n_{FC}$ | $R_{FC}$<br>( $\Omega \cdot \text{cm}^2$ ) | $Q_{dl}$<br>( $\text{S} \cdot \text{s}^\alpha / \text{cm}^2$ ) | $n_{dl}$ | $R_{ct}$<br>( $\Omega \cdot \text{cm}^2$ ) | $W$ | $C_{GC}$<br>( $\text{F} \cdot \text{cm}^2$ ) | $C_{FC}$<br>( $\text{F} \cdot \text{cm}^2$ ) | $C_{dl}$<br>( $\text{F} \cdot \text{cm}^2$ ) |
|----------------|-----------------------------------------|----------------------------------------------------------------|----------|--------------------------------------------|----------------------------------------------------------------|----------|--------------------------------------------|----------------------------------------------------------------|----------|--------------------------------------------|-----|----------------------------------------------|----------------------------------------------|----------------------------------------------|
| 0.25           | 0.0116                                  | 7.75E-10                                                       | 0.889    | 2.20E4                                     | 1.00E-6                                                        | 0.884    | 2.46E5                                     | 6.88E-06                                                       | 0.999    | 1.28E5                                     | --- | 3.3E-19                                      | 19.0E-8                                      | 6.9E-6                                       |
| 1              | 0.08305                                 | 7.29E-10                                                       | 0.896    | 2.10E4                                     | 3.29E-6                                                        | 0.840    | 2.11E5                                     | 1.86E-05                                                       | 0.531    | 1.78E4                                     | --- | 4.5E-11                                      | 11.8E-7                                      | 1.4E-10                                      |
| 2              | 513.1                                   | 2.74E-10                                                       | 0.968    | 2.62E4                                     | 4.09E-6                                                        | 0.801    | 7.00E5                                     | 1.82E-05                                                       | 0.713    | 5.83E3                                     | --- | 1.6E-18                                      | 18.8E-7                                      | 2.7E-6                                       |
| 3              | 752.1                                   | 2.98E-10                                                       | 0.965    | 2.76E4                                     | 7.68E-6                                                        | 0.770    | 2.40E6                                     | 9.01E-05                                                       | 0.432    | 1.30E3                                     | --- | 1.7E-11                                      | 11.6E-6                                      | 1.4E-6                                       |
| 5              | 647.9                                   | 3.09E-10                                                       | 0.960    | 2.17E4                                     | 4.15E-6                                                        | 0.828    | 2.18E5                                     | 4.66E-06                                                       | 0.816    | 1.70E4                                     | --- | 1.6E-11                                      | 11.2E-6                                      | 1.3E-6                                       |
| 7              | 495.8                                   | 3.98E-10                                                       | 0.942    | 2.46E4                                     | 1.71E-6                                                        | 0.855    | 7.63E4                                     | 2.85E-05                                                       | 0.646    | 3.89E3                                     | --- | 1.5E-17                                      | 17.6E-6                                      | 2.6E-6                                       |
| 9              | 352                                     | 3.62E-10                                                       | 0.956    | 2.22E4                                     | 2.99E-6                                                        | 0.908    | 2.54E4                                     | 8.30E-05                                                       | 0.216    | 1.14E4                                     | --- | 1.7E-11                                      | 11.9E-5                                      | 2.0E-10                                      |
| 12             | 656.4                                   | 2.70E-10                                                       | 0.97     | 2.50E4                                     | 4.95E-6                                                        | 0.88     | 9.16E4                                     | 1.50E-05                                                       | 0.27     | 1.19E4                                     | --- | 1.8E-13                                      | 13.2E-7                                      | 2.8E-7                                       |

|    |       |          |      |         |         |      |         |          |      |         |     |        |         |        |
|----|-------|----------|------|---------|---------|------|---------|----------|------|---------|-----|--------|---------|--------|
|    |       | 10       | 3    | 4       | 5       | 8    | 4       | 04       | 5    | 4       |     | 0      | 5       |        |
| 16 | 146.5 | 3.42E-10 | 0.95 | 2.10E-9 | 8.41E-5 | 0.90 | 1.61E-4 | 3.98E-05 | 0.24 | 5.72E-3 | --- | 1.6E-0 | 15.2E-5 | 5.9E-1 |
|    |       | 10       | 9    | 4       | 5       | 2    | 4       | 05       | 8    | 3       |     | 0      | 5       | 2      |

**Table S6.** The electrochemical parameters of the Q120G coating obtained through the equivalent circuit fitting.

| Time   | $R_s$                 | $Q_{GC}$                      | $R_{GC}$              | $Q_{FC}$                      | $R_{FC}$              | $Q_{dl}$                      | $R_{ct}$              | $C_{GC}$           | $C_{FC}$           | $C_{dl}$           |     |        |         |        |
|--------|-----------------------|-------------------------------|-----------------------|-------------------------------|-----------------------|-------------------------------|-----------------------|--------------------|--------------------|--------------------|-----|--------|---------|--------|
| (days) | ( $\Omega \cdot cm$ ) | ( $S \cdot s^\alpha / cm^2$ ) | ( $\Omega \cdot cm$ ) | ( $S \cdot s^\alpha / cm^2$ ) | ( $\Omega \cdot cm$ ) | ( $S \cdot s^\alpha / cm^2$ ) | ( $\Omega \cdot cm$ ) | ( $F \cdot cm^2$ ) | ( $F \cdot cm^2$ ) | ( $F \cdot cm^2$ ) |     |        |         |        |
| 0.25   | 446.8                 | 2.05E-10                      | 0.981                 | 2.41E-9                       | 3.90E-6               | 0.741                         | 3.33E-5               | 1.90E-8            | 0.795              | 1.91E-5            | --- | 1.5E-0 | 14.2E-7 | 5.7E-6 |
| 1      | 417.3                 | 2.75E-10                      | 0.961                 | 1.62E-9                       | 2.31E-4               | 0.811                         | 1.66E-6               | 7.79E-1            | 0.741              | 2.32E-3            | --- | 1.4E-0 | 11.3E-4 | 9.9E-7 |
| 2      | 0.014                 | 3.80E-10                      | 0.929                 | 2.24E-9                       | 9.04E-7               | 0.904                         | 1.90E-5               | 5.17E-9            | 0.999              | 1.74E-4            | --- | 5.3E-1 | 11.3E-7 | 5.2E-5 |
| 3      | 10                    | 3.90E-10                      | 0.927                 | 1.66E-9                       | 1.20E-5               | 0.652                         | 2.71E-5               | 2.76E-9            | 0.999              | 3.73E-4            | --- | 8.5E-1 | 19.5E-8 | 2.8E-5 |
| 5      | 581.1                 | 2.38E-10                      | 0.971                 | 1.69E-9                       | 1.14E-8               | 0.818                         | 2.12E-5               | 5.62E-2            | 0.382              | 1.17E-4            | --- | 1.5E-0 | 13.7E-6 | 2.0E-7 |
| 7      | 657.2                 | 2.31E-10                      | 0.976                 | 1.95E-9                       | 1.63E-8               | 0.858                         | 1.93E-5               | 7.97E-6            | 0.326              | 9.27E-3            | --- | 1.6E-0 | 17.7E-6 | 1.5E-7 |
| 9      | 863.3                 | 2.11E-10                      | 0.982                 | 2.48E-9                       | 2.42E-6               | 0.816                         | 6.60E-4               | 5.76E-8            | 0.428              | 3.11E-3            | --- | 1.6E-0 | 11.0E-5 | 7.5E-7 |
| 12     | 784.3                 | 2.44E-10                      | 0.971                 | 2.56E-9                       | 2.93E-5               | 0.921                         | 5.01E-4               | 5.60E-7            | 0.487              | 4.94E-3            | --- | 1.5E-0 | 12.1E-6 | 1.7E-6 |
| 16     | 779.5                 | 2.82E-10                      | 0.962                 | 1.59E-9                       | 2.37E-0               | 0.884                         | 1.45E-4               | 9.03E-6            | 0.654              | 3.62E-3            | --- | 1.5E-0 | 11.9E-4 | 5.9E-7 |

**Table S7.** The electrochemical parameters of the Q160G coating obtained through the equivalent circuit fitting.

| Time   | $R_s$                 | $Q_{GC}$                      | $R_{GC}$              | $Q_{FC}$                      | $R_{FC}$              | $Q_{dl}$                      | $R_{ct}$              | $C_{GC}$           | $C_{FC}$           | $C_{dl}$           |     |        |         |        |
|--------|-----------------------|-------------------------------|-----------------------|-------------------------------|-----------------------|-------------------------------|-----------------------|--------------------|--------------------|--------------------|-----|--------|---------|--------|
| (days) | ( $\Omega \cdot cm$ ) | ( $S \cdot s^\alpha / cm^2$ ) | ( $\Omega \cdot cm$ ) | ( $S \cdot s^\alpha / cm^2$ ) | ( $\Omega \cdot cm$ ) | ( $S \cdot s^\alpha / cm^2$ ) | ( $\Omega \cdot cm$ ) | ( $F \cdot cm^2$ ) | ( $F \cdot cm^2$ ) | ( $F \cdot cm^2$ ) |     |        |         |        |
| 0.25   | 899.4                 | 3.77E-10                      | 0.95                  | 1.46E-9                       | 8.96E-9               | 0.99                          | 7.79E-5               | 7.82E-0            | 0.62               | 2.07E-5            | --- | 1.8E-0 | 19.0E-6 | 3.7E-7 |
| 1      | 892.8                 | 3.49E-10                      | 0.95                  | 1.53E-9                       | 1.80E-5               | 0.80                          | 5.31E-7               | 6.10E-9            | 0.99               | 3.49E-2            | --- | 1.8E-0 | 13.8E-7 | 6.1E-7 |
| 2      | 158.5                 | 6.03E-10                      | 0.90                  | 1.63E-9                       | 9.85E-2               | 0.86                          | 3.94E-5               | 2.91E-9            | 0.99               | 3.75E-5            | --- | 1.1E-0 | 12.4E-7 | 2.9E-6 |
| 3      | 468.8                 | 4.57E-10                      | 0.93                  | 1.58E-9                       | 3.30E-8               | 0.90                          | 9.25E-5               | 3.38E-8            | 0.75               | 3.63E-5            | --- | 1.4E-0 | 11.7E-6 | 4.3E-7 |
| 5      | 910.5                 | 3.90E-10                      | 0.94                  | 1.71E-9                       | 5.35E-7               | 0.78                          | 1.42E-4               | 1.94E-8            | 0.86               | 1.57E-5            | --- | 1.7E-0 | 11.2E-6 | 1.0E-6 |

|    |       |          |      |         |         |      |         |         |      |         |     |        |         |        |
|----|-------|----------|------|---------|---------|------|---------|---------|------|---------|-----|--------|---------|--------|
|    |       | 10       | 9    | 4       | 6       | 4    | 6       | 5       | 1    | 5       |     | 0      | 6       | 5      |
| 7  | 527.5 | 4.17E-10 | 0.93 | 1.41E-8 | 5.50E-6 | 0.80 | 9.24E-5 | 9.45E-6 | 0.70 | 1.56E-4 | --- | 1.5E-0 | 11.3E-6 | 9.8E-7 |
| 9  | 934.6 | 3.67E-10 | 0.95 | 1.66E-8 | 1.61E-5 | 0.86 | 4.26E-5 | 3.17E-6 | 0.50 | 1.78E-4 | --- | 1.8E-0 | 18.3E-6 | 9.1E-7 |
| 12 | 712.9 | 3.81E-10 | 0.94 | 1.70E-8 | 1.29E-5 | 0.80 | 1.81E-5 | 2.81E-6 | 0.57 | 7.75E-4 | --- | 1.6E-0 | 14.2E-6 | 1.4E-7 |
| 16 | 898.1 | 4.00E-10 | 0.94 | 1.75E-8 | 8.28E-6 | 0.82 | 1.06E-5 | 3.63E-6 | 0.53 | 7.48E-4 | --- | 1.7E-0 | 12.9E-6 | 1.6E-7 |

**Table S8.** The electrochemical parameters of the Q200G coating obtained through the equivalent circuit fitting.

| Time (days) | $R_s$ ( $\Omega \cdot \text{cm}^2$ ) | $Q_{GC}$ ( $\text{S} \cdot \text{s}^\alpha / \text{cm}^2$ ) | $n_{GC}$ | $R_{GC}$ ( $\Omega \cdot \text{cm}^2$ ) | $Q_{FC}$ ( $\text{S} \cdot \text{s}^\alpha / \text{cm}^2$ ) | $n_{FC}$ | $R_{FC}$ ( $\Omega \cdot \text{cm}^2$ ) | $Q_{dl}$ ( $\text{S} \cdot \text{s}^\alpha / \text{cm}^2$ ) | $n_{dl}$ | $R_{ct}$ ( $\Omega \cdot \text{cm}^2$ ) | $W$ ( $\text{W}$ ) | $C_{GC}$ ( $\text{F} \cdot \text{cm}^2$ ) | $C_{FC}$ ( $\text{F} \cdot \text{cm}^2$ ) | $C_{dl}$ ( $\text{F} \cdot \text{cm}^2$ ) |
|-------------|--------------------------------------|-------------------------------------------------------------|----------|-----------------------------------------|-------------------------------------------------------------|----------|-----------------------------------------|-------------------------------------------------------------|----------|-----------------------------------------|--------------------|-------------------------------------------|-------------------------------------------|-------------------------------------------|
| 0.25        | 1081                                 | 3.19E-10                                                    | 0.93     | 2.14E-4                                 | 2.37E-6                                                     | 0.81     | 2.86E-6                                 | 2.69E-6                                                     | 0.79     | 3.78E-5                                 | ---                | 1.1E-0                                    | 16.0E-7                                   | 5.9E-7                                    |
| 1           | 1037                                 | 3.07E-10                                                    | 0.93     | 2.19E-4                                 | 1.82E-6                                                     | 0.77     | 6.98E-6                                 | 1.24E-6                                                     | 0.77     | 5.71E-5                                 | ---                | 1.1E-0                                    | 13.0E-7                                   | 3.5E-6                                    |
| 2           | 1799                                 | 2.91E-10                                                    | 0.94     | 2.82E-4                                 | 2.15E-6                                                     | 0.77     | 8.17E-6                                 | 5.29E-6                                                     | 0.57     | 4.83E-5                                 | ---                | 1.2E-0                                    | 14.1E-7                                   | 1.8E-7                                    |
| 3           | 2281                                 | 2.88E-10                                                    | 0.95     | 3.39E-4                                 | 1.00E-6                                                     | 0.67     | 1.13E-6                                 | 3.87E-6                                                     | 0.78     | 7.62E-5                                 | ---                | 1.4E-0                                    | 11.6E-7                                   | 1.1E-6                                    |
| 5           | 2033                                 | 2.78E-10                                                    | 0.95     | 3.67E-4                                 | 4.52E-6                                                     | 0.74     | 1.66E-6                                 | 5.78E-6                                                     | 0.80     | 5.78E-5                                 | ---                | 1.3E-0                                    | 19.1E-7                                   | 1.2E-6                                    |
| 7           | 2326                                 | 2.98E-10                                                    | 0.95     | 4.40E-4                                 | 5.67E-6                                                     | 0.70     | 9.97E-6                                 | 5.15E-6                                                     | 0.89     | 3.16E-4                                 | 1.2E-4             | 1.4E-0                                    | 19.4E-7                                   | 3.1E-6                                    |
| 9           | 0.0193                               | 1.92E-10                                                    | 0.99     | 3.94E-4                                 | 1.73E-6                                                     | 0.85     | 2.31E-6                                 | 1.07E-6                                                     | 0.54     | 8.14E-4                                 | 6.5E-4             | 1.9E-0                                    | 18.5E-7                                   | 7.7E-1                                    |
| 12          | 6.428                                | 1.31E-10                                                    | 0.98     | 4.02E-4                                 | 1.89E-6                                                     | 0.84     | 1.69E-6                                 | 1.36E-6                                                     | 0.87     | 9.25E-4                                 | 1.0E-4             | 1.0E-0                                    | 12.2E-7                                   | 6.6E-1                                    |
| 16          | 0.03909                              | 1.95E-10                                                    | 0.99     | 3.81E-4                                 | 1.74E-6                                                     | 0.86     | 2.17E-6                                 | 1.97E-6                                                     | 0.51     | 8.36E-4                                 | 8.4E-4             | 1.9E-0                                    | 11.3E-7                                   | 3.7E-1                                    |

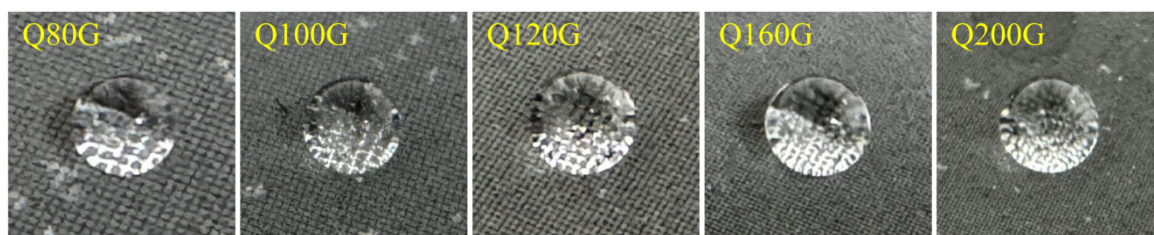

**Figure S1.** Silver mirror effect of Q80G, Q100G, Q120G, Q160G, and Q200G coatings at room temperature and at conditions of -10 °C and 60 % relative humidity, respectively.
